# Supplementary material
Source: PubMed Central journal article supplement (PMC1480436)
Supplement: pnas_0603176103_1.pdf [file pnas_0603176103_1.pdf]

### EF1

|            |                           |                                             |                                                                     |                                                           |                                    |    |
|------------|---------------------------|---------------------------------------------|---------------------------------------------------------------------|-----------------------------------------------------------|------------------------------------|----|
| Aequorin   | MLYDVPDYASLKLTSDFDNPRWIGR | <b>H</b> K <b>H</b> M <b>F</b> N <b>F</b> L | D <b>V</b> N <b>H</b> N <b>G</b> K <b>I</b> S <b>L</b> D <b>E</b> M | <b>V</b> <b>V</b> <b>K</b> <b>A</b> S <b>D</b> I <b>V</b> | I <b>N</b> N <b>L</b> G <b>A</b>   | 50 |
| Obelin     | ----MSSKYAVKLKTD          | <b>H</b> K <b>H</b> M <b>F</b> D <b>F</b> L | D <b>I</b> N <b>G</b> N <b>G</b> K <b>I</b> T <b>L</b> D <b>E</b> I | <b>V</b> <b>S</b> <b>K</b> <b>A</b> S <b>D</b> D          | I <b>C</b> A <b>K</b> L <b>E</b> A | 56 |
| Clytin     | -MADTASKYAVKL             | <b>H</b> K <b>F</b> M <b>F</b> N <b>F</b> L | D <b>I</b> N <b>G</b> D <b>G</b> K <b>I</b> T <b>L</b> D <b>E</b> I | <b>V</b> <b>S</b> <b>K</b> <b>A</b> S <b>D</b> D          | I <b>C</b> A <b>K</b> L <b>G</b> A | 59 |
| Mitrocomin | --MSMGSRYAVKLTT           | <b>H</b> K <b>H</b> M <b>F</b> N <b>F</b> L | D <b>I</b> N <b>S</b> N <b>G</b> Q <b>I</b> N <b>L</b> N <b>E</b> M | <b>V</b> <b>H</b> <b>K</b> <b>A</b> S <b>N</b> I          | I <b>C</b> K <b>K</b> L <b>G</b> A | 58 |

|            |         |                                                      |                                                                                                               |                                                                                                                          |                                           |     |
|------------|---------|------------------------------------------------------|---------------------------------------------------------------------------------------------------------------|--------------------------------------------------------------------------------------------------------------------------|-------------------------------------------|-----|
| Aequorin   | TPEQAKR | <b>H</b> K <b>D</b> A <b>V</b> E <b>A</b> F <b>F</b> | G <b>G</b> A <b>G</b> M <b>K</b> Y <b>G</b> V <b>E</b> T <b>D</b> W <b>P</b> A <b>Y</b> I <b>E</b> G <b>W</b> | <b>K</b> L <b>A</b> T <b>D</b> E <b>L</b> E <b>K</b> Y <b>A</b> K <b>N</b> E <b>P</b> T <b>L</b> I                       | <b>R</b> I <b>R</b> I <b>W</b> G <b>D</b> | 110 |
| Obelin     | TPEQTKR | <b>H</b> Q <b>V</b> C <b>V</b> E <b>A</b> F <b>F</b> | R <b>G</b> C <b>G</b> M <b>E</b> Y <b>G</b> K <b>E</b> I <b>A</b> F <b>P</b> Q <b>F</b>                       | L <b>D</b> G <b>W</b> <b>K</b> L <b>A</b> T <b>S</b> E <b>L</b> K <b>K</b> W <b>A</b> R <b>N</b> E <b>P</b> T <b>L</b> I | <b>R</b> E <b>W</b> G <b>D</b>            | 116 |
| Clytin     | TPEQTKR | <b>H</b> Q <b>D</b> A <b>V</b> E <b>A</b> F <b>F</b> | K <b>I</b> G <b>M</b> D <b>Y</b> G <b>K</b> E <b>V</b> E <b>F</b> P <b>A</b> F <b>V</b>                       | D <b>G</b> <b>W</b> <b>K</b> E <b>L</b> A <b>N</b> Y <b>D</b> L <b>K</b> L <b>S</b> Q <b>N</b> K <b>K</b> S <b>L</b> I   | <b>R</b> D <b>W</b> G <b>E</b>            | 119 |
| Mitrocomin | TEEQTKR | <b>H</b> Q <b>K</b> C <b>V</b> E <b>D</b> E <b>F</b> | G <b>G</b> A <b>G</b> L <b>E</b> Y <b>D</b> K <b>D</b> T <b>T</b> W <b>P</b> E <b>Y</b> I <b>E</b> G <b>W</b> | <b>K</b> R <b>L</b> A <b>K</b> T <b>E</b> L <b>E</b> R <b>H</b> S <b>K</b> N <b>Q</b> V <b>T</b> L <b>I</b>              | <b>R</b> L <b>W</b> G <b>D</b>            | 118 |

### EF2

### EF3

|            |                                                                                                                                                                                                                                                                                                                                           |                                                                                                                                                                                 |     |
|------------|-------------------------------------------------------------------------------------------------------------------------------------------------------------------------------------------------------------------------------------------------------------------------------------------------------------------------------------------|---------------------------------------------------------------------------------------------------------------------------------------------------------------------------------|-----|
| Aequorin   | A <b>L</b> F <b>D</b> I <b>V</b> D <b>K</b> D <b>Q</b> N <b>G</b> A <b>I</b> T <b>L</b> D <b>E</b> W <b>K</b> A <b>Y</b> T <b>K</b> A <b>A</b> G <b>I</b>                                                                                                                                                                                 | I <b>Q</b> S <b>S</b> E <b>D</b> C <b>E</b> E <b>T</b> F <b>R</b> V <b>C</b> D <b>I</b> D <b>E</b> S <b>G</b> Q <b>L</b> D <b>V</b> D <b>E</b> M <b>T</b> R <b>Q</b> H <b>L</b> | 170 |
| Obelin     | A <b>V</b> F <b>D</b> I <b>F</b> D <b>K</b> D <b>G</b> S <b>G</b> T <b>I</b> T <b>L</b> D <b>E</b> W <b>K</b> A <b>Y</b> G <b>K</b> I <b>S</b> G <b>I</b> S <b>P</b> S <b>Q</b> E <b>D</b> C <b>E</b> A <b>T</b> F <b>R</b> H <b>C</b> D <b>L</b> D <b>N</b> S <b>G</b> D <b>L</b> D <b>V</b> D <b>E</b> M <b>T</b> R <b>Q</b> H <b>L</b> | 176                                                                                                                                                                             |     |
| Clytin     | A <b>V</b> F <b>D</b> I <b>F</b> D <b>K</b> D <b>G</b> S <b>G</b> S <b>I</b> S <b>L</b> D <b>E</b> W <b>K</b> A <b>Y</b> G <b>R</b> I <b>S</b> G <b>I</b> C <b>S</b> S <b>D</b> E <b>D</b> A <b>E</b> K <b>T</b> F <b>K</b> H <b>C</b> D <b>L</b> D <b>N</b> S <b>G</b> K <b>L</b> D <b>V</b> D <b>E</b> M <b>T</b> R <b>Q</b> H <b>L</b> | 179                                                                                                                                                                             |     |
| Mitrocomin | A <b>L</b> F <b>D</b> I <b>I</b> D <b>K</b> D <b>R</b> N <b>G</b> S <b>V</b> S <b>L</b> D <b>E</b> W <b>I</b> Q <b>Y</b> T <b>H</b> C <b>A</b> G <b>I</b> Q <b>Q</b> S <b>R</b> G <b>Q</b> C <b>E</b> A <b>T</b> F <b>A</b> H <b>C</b> D <b>L</b> D <b>G</b> D <b>G</b> K <b>L</b> D <b>V</b> D <b>E</b> M <b>T</b> R <b>Q</b> H <b>L</b> | 178                                                                                                                                                                             |     |

|            |                                                                                                           |
|------------|-----------------------------------------------------------------------------------------------------------|
| Aequorin   | G <b>F</b> W <b>Y</b> T <b>M</b> D <b>P</b> A <b>C</b> E <b>K</b> L <b>Y</b> G <b>G</b> A <b>V</b> P- 189 |
| Obelin     | G <b>F</b> W <b>Y</b> T <b>L</b> D <b>P</b> E <b>A</b> D <b>G</b> L <b>Y</b> G <b>N</b> G <b>V</b> P- 195 |
| Clytin     | G <b>F</b> W <b>Y</b> T <b>L</b> D <b>P</b> N <b>A</b> D <b>G</b> L <b>Y</b> G <b>N</b> F <b>V</b> P- 198 |
| Mitrocomin | G <b>F</b> W <b>Y</b> S <b>V</b> D <b>P</b> T <b>C</b> E <b>G</b> L <b>Y</b> G <b>G</b> A <b>V</b> P- 198 |
