# Supplementary material
Source: PubMed Central journal article supplement (PMC1480436)

**A**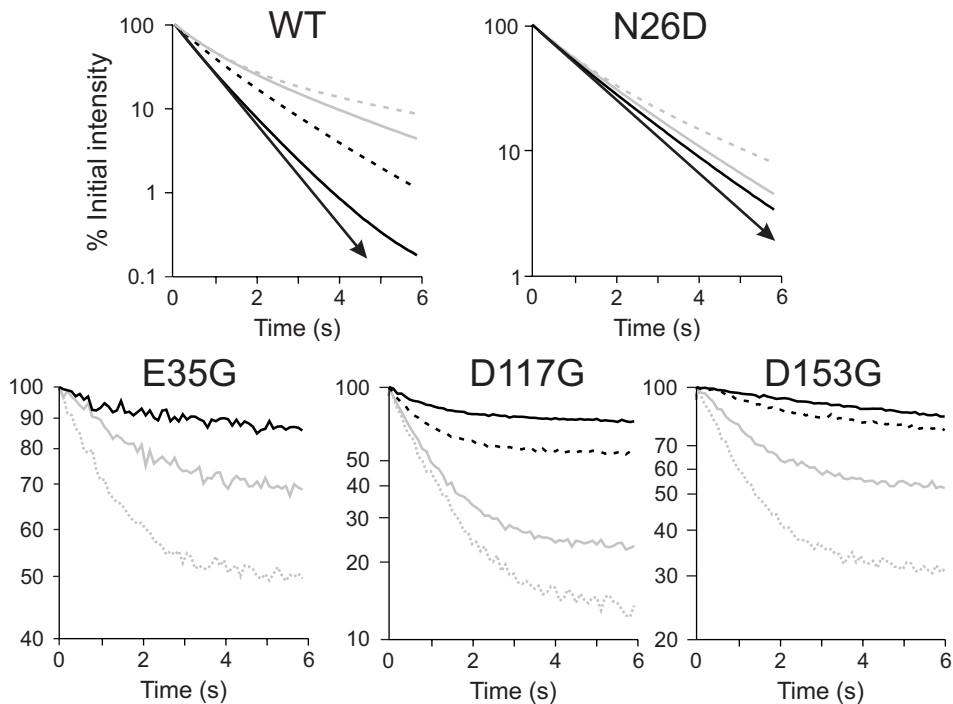**B**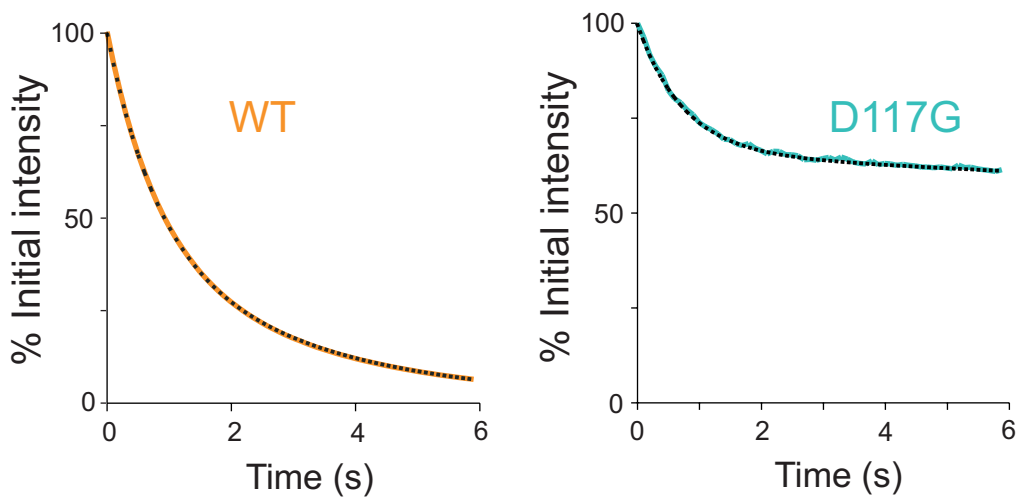

Supplement: pnas_0603176103_2.pdf [file pnas_0603176103_2.pdf]

# WT

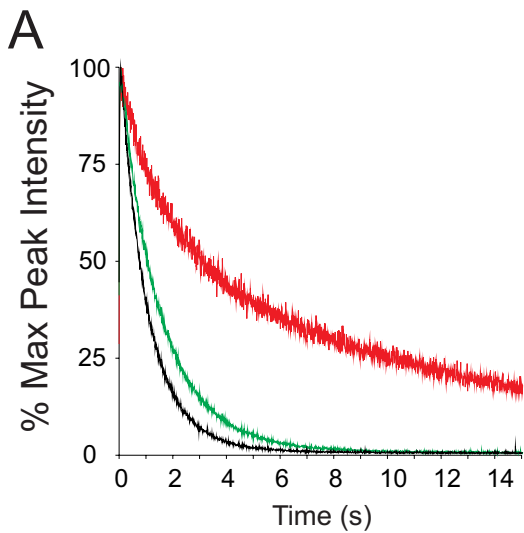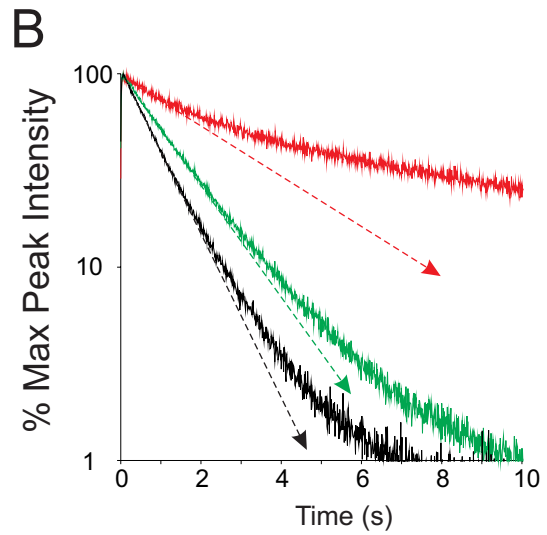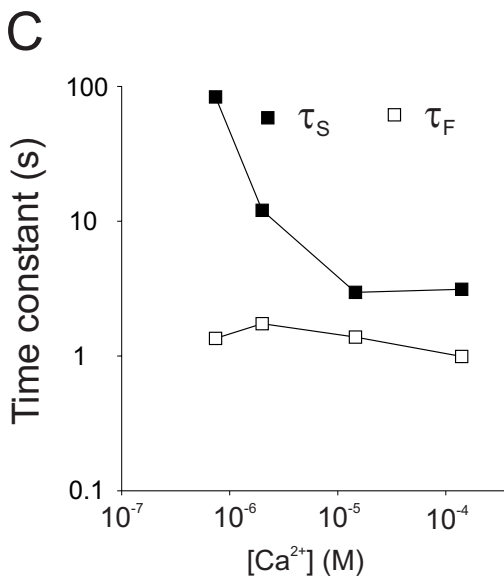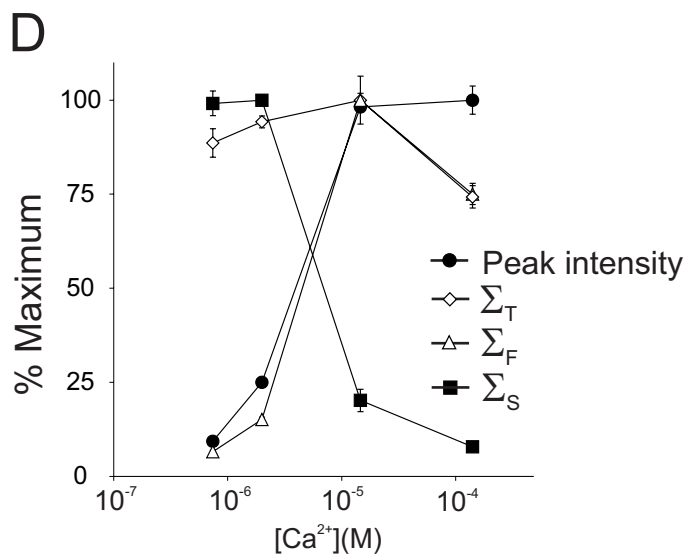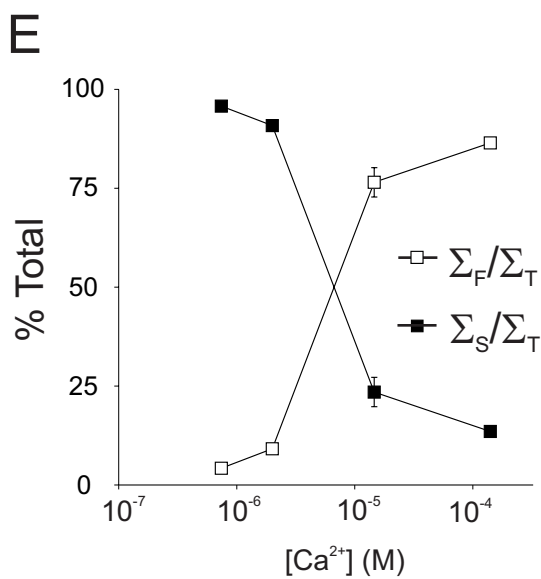

Supplement: pnas_0603176103_3.pdf [file pnas_0603176103_3.pdf]

# D153G

## A

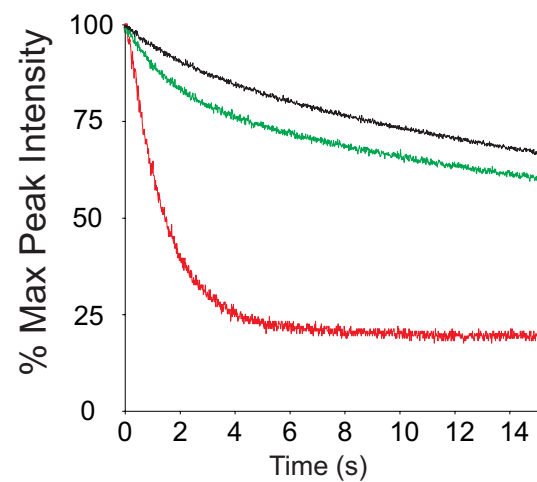

## B

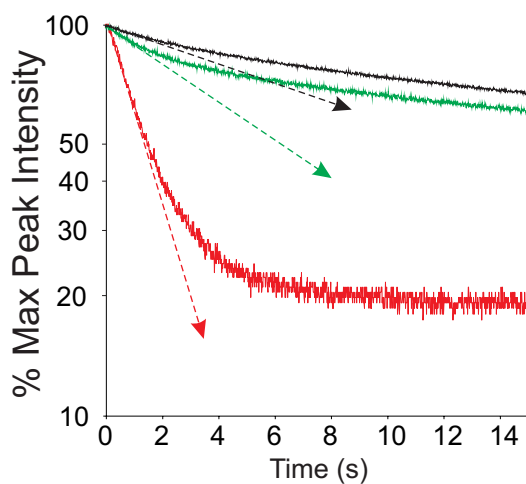

## C

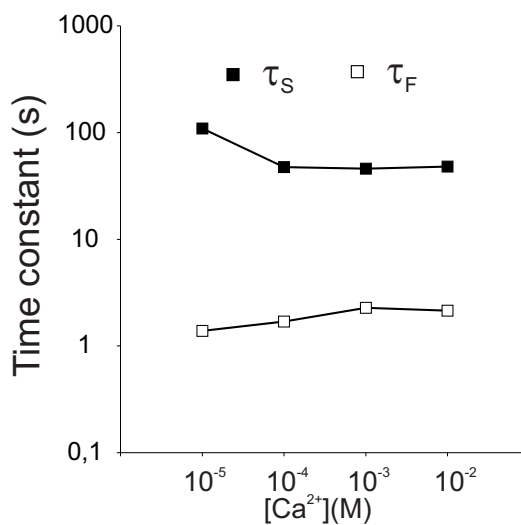

## D

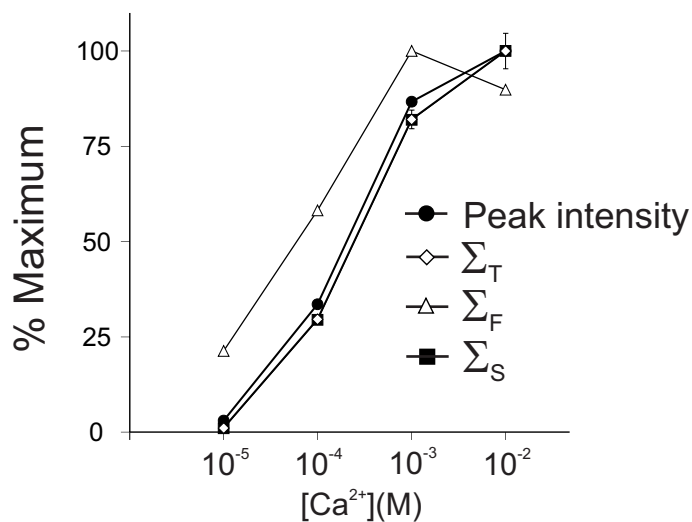

## E

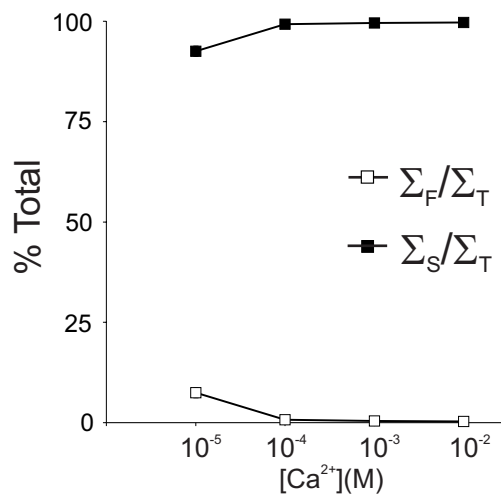

Supplement: pnas_0603176103_4.pdf [file pnas_0603176103_4.pdf]
